# Supplementary material
Source: publisher figshare collection journal article supplement (https://frontiersin.figshare.com/ndownloader/files/14253020)
Supplement: Supplementary file [file 14253020]

## *Supplementary Material*

### **Identification of loci and candidate genes responsible for fiber length in upland cotton (*Gossypium hirsutum* L.) via association mapping and linkage analyses**

**Chi Zhang<sup>#</sup>, Libei Li<sup>#</sup>, Qibao Liu**

<sup>#</sup>Contributed equally to this work.

\* **Correspondence:** Shuxun Yu: [ysx195311@163.com](mailto:ysx195311@163.com).

#### **Supplementary Tables**

**Supplementary Table 1:** Summary of the 355 SLAF-seq accessions.

| <b>Sample</b> | <b>Cultivar/Germplasm line</b> | <b>Origin</b> | <b>Ecological region</b> | <b>Clean reads</b> | <b>Read length</b> | <b>Clean Bases (Mb)</b> | <b>Mapping rate (%)</b> | <b>Mean depth</b> |
|---------------|--------------------------------|---------------|--------------------------|--------------------|--------------------|-------------------------|-------------------------|-------------------|
| S1            | Zhong2191                      | Henan         | YRR                      | 2,060,776          | 80                 | 329.7                   | 98.94                   | 4.57              |
| S2            | Zhong40418                     | Henan         | YRR                      | 1,953,983          | 80                 | 312.6                   | 99.31                   | 4.33              |
| S3            | Zhong40618                     | Henan         | YRR                      | 2,602,031          | 80                 | 416.3                   | 99.25                   | 5.77              |

|     |               |       |     |           |    |       |       |      |
|-----|---------------|-------|-----|-----------|----|-------|-------|------|
| S4  | Zhong40612    | Henan | YRR | 2,753,449 | 80 | 440.6 | 99.14 | 6.11 |
| S5  | Zhong51811    | Henan | YRR | 2,120,626 | 80 | 339.3 | 99.18 | 4.70 |
| S6  | CRI94A1822    | Henan | YRR | 2,119,866 | 80 | 339.2 | 99.31 | 4.70 |
| S7  | Zhong61832    | Henan | YRR | 2,447,539 | 80 | 391.6 | 98.54 | 5.43 |
| S8  | Zhong71239    | Henan | YRR | 2,306,633 | 80 | 369.1 | 98.70 | 5.12 |
| S9  | PB12-1-10     | Henan | YRR | 2,455,469 | 80 | 392.9 | 99.15 | 5.45 |
| S10 | PB12-1-7      | Henan | YRR | 3,109,997 | 80 | 497.6 | 98.87 | 6.90 |
| S11 | PB12-1-8      | Henan | YRR | 2,240,263 | 80 | 358.4 | 98.89 | 4.97 |
| S12 | Zhong1476     | Henan | YRR | 2,023,692 | 80 | 323.8 | 99.13 | 4.49 |
| S13 | Zhong151222   | Henan | YRR | 2,060,750 | 80 | 329.7 | 99.07 | 4.57 |
| S14 | Zhong152201   | Henan | YRR | 2,419,621 | 80 | 387.1 | 99.00 | 5.37 |
| S15 | Zhong152201SQ | Henan | YRR | 2,432,241 | 80 | 389.2 | 99.18 | 5.40 |
| S16 | Zhong152214   | Henan | YRR | 2,954,591 | 80 | 472.7 | 99.05 | 6.55 |
| S17 | Zhong152224   | Henan | YRR | 2,312,093 | 80 | 369.9 | 99.17 | 5.13 |
| S18 | SS2011        | Henan | YRR | 2,656,266 | 80 | 425   | 99.14 | 5.89 |
| S19 | CQ2012-3      | Henan | YRR | 2,648,525 | 80 | 423.8 | 99.34 | 5.88 |
| S20 | CQ2012-4      | Henan | YRR | 2,613,289 | 80 | 418.1 | 99.37 | 5.80 |
| S21 | Zhong29T41    | Henan | YRR | 2,159,647 | 80 | 345.5 | 99.13 | 4.79 |
| S22 | Zhong29T42    | Henan | YRR | 2,601,951 | 80 | 416.3 | 98.96 | 5.77 |

|     |               |            |           |           |    |       |       |      |
|-----|---------------|------------|-----------|-----------|----|-------|-------|------|
| S23 | L426          | Henan      | YRR       | 1,719,364 | 80 | 275.1 | 99.08 | 3.81 |
| S24 | K640          | Shandong   | YRR       | 2,127,164 | 80 | 340.3 | 99.13 | 4.72 |
| S25 | N82           | America    | Amerasian | 1,554,657 | 80 | 248.7 | 98.89 | 3.45 |
| S26 | P21-6-7       | America    | Amerasian | 2,618,266 | 80 | 418.9 | 99.30 | 5.81 |
| S27 | Shannong SF06 | Shandong   | YRR       | 2,003,835 | 80 | 320.6 | 99.00 | 4.45 |
| S28 | sGK16         | Beijing    | YRR       | 2,445,710 | 80 | 391.3 | 99.28 | 5.43 |
| S29 | V321-20-14    | Beijing    | YRR       | 2,282,204 | 80 | 365.2 | 99.35 | 5.06 |
| S30 | Baimian 17    | Henan      | YRR       | 2,228,620 | 80 | 356.6 | 99.45 | 4.94 |
| S31 | Chaoaoyang 1  | Azerbaijan | Amerasian | 2,147,802 | 80 | 343.6 | 99.49 | 4.76 |
| S32 | Deltapine 20  | America    | Amerasian | 1,835,450 | 80 | 293.7 | 98.85 | 4.07 |
| S33 | De 97-047     | America    | Amerasian | 2,269,305 | 80 | 363.1 | 99.07 | 5.03 |
| S34 | Guannong 1    | Liaoning   | NSER      | 2,032,094 | 80 | 325.1 | 99.47 | 4.51 |
| S35 | Han2490       | Hebei      | YRR       | 2,153,636 | 80 | 344.6 | 99.45 | 4.78 |
| S36 | Han656        | Hebei      | YRR       | 2,691,400 | 80 | 430.6 | 99.13 | 5.97 |
| S37 | Han559        | Hebei      | YRR       | 2,341,165 | 80 | 374.6 | 99.42 | 5.19 |
| S38 | Han667        | Hebei      | YRR       | 2,416,789 | 80 | 386.7 | 99.22 | 5.36 |
| S39 | Han686        | Hebei      | YRR       | 2,541,363 | 80 | 406.6 | 98.93 | 5.64 |
| S40 | Han9609       | Hebei      | YRR       | 2,274,857 | 80 | 364   | 99.28 | 5.05 |
| S41 | Heishanmian1  | Liaoning   | NSER      | 2,761,341 | 80 | 441.8 | 98.92 | 6.13 |

|     |                 |                          |      |           |    |       |       |      |
|-----|-----------------|--------------------------|------|-----------|----|-------|-------|------|
| S42 | Jinmian3        | Liaoning                 | NSER | 1,786,724 | 80 | 285.9 | 98.85 | 3.96 |
| S43 | Jinmian10       | Shanxi                   | YRR  | 2,313,590 | 80 | 370.2 | 99.28 | 5.13 |
| S44 | Jinmian21       | Shanxi                   | YRR  | 2,300,224 | 80 | 368   | 99.34 | 5.10 |
| S45 | Jinmian23       | Shanxi                   | YRR  | 2,838,263 | 80 | 454.1 | 99.08 | 6.30 |
| S46 | Jinmian5        | Shanxi                   | YRR  | 2,224,189 | 80 | 355.9 | 98.93 | 4.93 |
| S47 | Liaomian10      | Liaoning                 | NSER | 1,960,546 | 80 | 313.7 | 98.87 | 4.35 |
| S48 | Liaomian17      | Liaoning                 | NSER | 1,921,278 | 80 | 307.4 | 98.82 | 4.26 |
| S49 | Liaomian5       | Liaoning                 | NSER | 2,488,613 | 80 | 398.2 | 98.76 | 5.52 |
| S50 | Liaomian6       | Liaoning                 | NSER | 1,884,525 | 80 | 301.5 | 98.27 | 4.18 |
| S51 | Liaomian7       | Liaoning                 | NSER | 2,017,239 | 80 | 322.8 | 98.32 | 4.48 |
| S52 | Liaomian9       | Liaoning                 | NSER | 2,041,945 | 80 | 326.7 | 98.86 | 4.53 |
| S53 | Liaoyangduanjie | Liaoning                 | NSER | 2,092,310 | 80 | 334.8 | 98.83 | 4.64 |
| S54 | Lu154           | Shandong                 | YRR  | 1,962,866 | 80 | 314.1 | 98.53 | 4.36 |
| S55 | Lumianyan19     | Shandong                 | YRR  | 2,182,657 | 80 | 349.2 | 98.81 | 4.84 |
| S56 | Lumian2153      | Shandong                 | YRR  | 2,278,007 | 80 | 364.5 | 98.91 | 5.05 |
| S57 | Nongken5        | the North of<br>Xinjiang | NIR  | 2,411,688 | 80 | 385.9 | 98.90 | 5.35 |
| S58 | Shan70          | Shanxi                   | NIR  | 3,159,325 | 80 | 505.5 | 98.41 | 7.01 |
| S59 | Shizao1         | Hebei                    | YRR  | 1,973,542 | 80 | 315.8 | 98.59 | 4.38 |

|     |            |                          |     |           |    |       |       |      |
|-----|------------|--------------------------|-----|-----------|----|-------|-------|------|
| S60 | Shizao2    | Hebei                    | YRR | 2,604,364 | 80 | 416.7 | 99.00 | 5.78 |
| S61 | Shizao3    | Hebei                    | YRR | 2,729,196 | 80 | 436.7 | 97.14 | 6.06 |
| S62 | X13-7      | Henan                    | YRR | 1,801,755 | 80 | 288.3 | 99.09 | 4.00 |
| S63 | X25TF      | Henan                    | YRR | 2,785,260 | 80 | 445.6 | 98.90 | 6.18 |
| S64 | Xiazao1    | Hebei                    | YRR | 2,347,939 | 80 | 375.7 | 99.32 | 5.21 |
| S65 | Xiazao2    | Hebei                    | YRR | 2,631,398 | 80 | 421   | 99.02 | 5.84 |
| S66 | Xiazao3    | Hebei                    | YRR | 2,192,213 | 80 | 350.8 | 99.07 | 4.86 |
| S67 | Xinluzao11 | the North of<br>Xinjiang | NIR | 2,276,120 | 80 | 364.2 | 98.24 | 5.05 |
| S68 | Xinluzao36 | the North of<br>Xinjiang | NIR | 2,050,178 | 80 | 328   | 98.58 | 4.55 |
| S69 | Xinluzao3  | the North of<br>Xinjiang | NIR | 3,075,952 | 80 | 492.2 | 98.50 | 6.82 |
| S70 | Xinluzao42 | the North of<br>Xinjiang | NIR | 2,496,194 | 80 | 399.4 | 99.11 | 5.54 |
| S71 | Xinluzao45 | the North of<br>Xinjiang | NIR | 2,353,151 | 80 | 376.5 | 99.26 | 5.22 |
| S72 | Xinluzao4  | the North of<br>Xinjiang | NIR | 2,550,152 | 80 | 408   | 98.84 | 5.66 |

|     |                |                          |     |           |    |       |       |      |
|-----|----------------|--------------------------|-----|-----------|----|-------|-------|------|
| S73 | Xinluzao6      | the North of<br>Xinjiang | NIR | 2,243,926 | 80 | 359   | 99.11 | 4.98 |
| S74 | Xinluzao8      | the North of<br>Xinjiang | NIR | 2,081,070 | 80 | 333   | 98.73 | 4.62 |
| S75 | Xinluzao9      | the North of<br>Xinjiang | NIR | 1,550,469 | 80 | 248.1 | 98.51 | 3.44 |
| S76 | Mianxiang368   | Henan                    | YRR | 1,903,697 | 80 | 304.6 | 98.84 | 4.22 |
| S77 | Yu1335         | Henan                    | YRR | 2,254,186 | 80 | 360.7 | 98.69 | 5.00 |
| S78 | Yumian12       | Henan                    | YRR | 3,339,607 | 80 | 534.3 | 99.09 | 7.41 |
| S79 | Yuzao8E13      | Henan                    | YRR | 2,187,787 | 80 | 350   | 99.20 | 4.85 |
| S80 | Yuzao9110      | Henan                    | YRR | 2,187,114 | 80 | 349.9 | 98.84 | 4.85 |
| S81 | Jinmian57      | Shanxi                   | YRR | 2,010,206 | 80 | 321.6 | 98.55 | 4.46 |
| S82 | YunzaoN95      | Shanxi                   | YRR | 1,991,584 | 80 | 318.7 | 98.94 | 4.42 |
| S83 | Zhong416       | Henan                    | YRR | 2,071,272 | 80 | 331.4 | 98.89 | 4.60 |
| S84 | Zhong425-5     | Henan                    | YRR | 2,697,952 | 80 | 431.7 | 99.09 | 5.99 |
| S85 | Zhong716       | Henan                    | YRR | 2,479,472 | 80 | 396.7 | 98.74 | 5.50 |
| S86 | Zhong213       | Henan                    | YRR | 2,169,109 | 80 | 347.1 | 98.22 | 4.81 |
| S87 | Zhongchuang 88 | Hebei                    | YRR | 2,055,165 | 80 | 328.8 | 98.93 | 4.56 |
| S88 | CRI10          | Henan                    | YRR | 2,330,037 | 80 | 372.8 | 99.12 | 5.17 |

|      |             |       |     |           |    |       |       |      |
|------|-------------|-------|-----|-----------|----|-------|-------|------|
| S89  | CRI14       | Henan | YRR | 2,186,627 | 80 | 349.9 | 99.16 | 4.85 |
| S90  | CRI16       | Henan | YRR | 2,402,710 | 80 | 384.4 | 98.43 | 5.33 |
| S91  | CRI20       | Henan | YRR | 2,596,649 | 80 | 415.5 | 98.50 | 5.76 |
| S92  | CRI24       | Henan | YRR | 2,753,249 | 80 | 440.5 | 99.03 | 6.11 |
| S93  | CRI27       | Henan | YRR | 2,188,073 | 80 | 350.1 | 98.98 | 4.85 |
| S94  | CRI30       | Henan | YRR | 2,394,526 | 80 | 383.1 | 98.69 | 5.31 |
| S95  | CRI36       | Henan | YRR | 2,042,230 | 80 | 326.8 | 98.96 | 4.53 |
| S96  | Han256      | Hebei | YRR | 2,239,447 | 80 | 358.3 | 99.19 | 4.97 |
| S97  | CRI37       | Henan | YRR | 2,192,488 | 80 | 350.8 | 99.07 | 4.86 |
| S98  | CRI42       | Henan | YRR | 2,974,180 | 80 | 475.9 | 98.76 | 6.60 |
| S99  | CRI50       | Henan | YRR | 2,120,164 | 80 | 339.2 | 98.79 | 4.70 |
| S100 | CRI58       | Henan | YRR | 2,615,766 | 80 | 418.5 | 98.90 | 5.80 |
| S101 | CRI64       | Henan | YRR | 2,016,377 | 80 | 322.6 | 98.88 | 4.47 |
| S102 | CRI74       | Henan | YRR | 2,098,420 | 80 | 335.7 | 98.75 | 4.65 |
| S103 | Zhong00776  | Henan | YRR | 1,967,754 | 80 | 314.8 | 99.01 | 4.37 |
| S104 | Zhong20398  | Henan | YRR | 2,335,762 | 80 | 373.7 | 98.86 | 5.18 |
| S105 | Zhong61930  | Henan | YRR | 2,211,613 | 80 | 353.9 | 98.94 | 4.91 |
| S106 | Zhong61995  | Henan | YRR | 3,185,194 | 80 | 509.6 | 99.23 | 7.07 |
| S107 | Zhong102909 | Henan | YRR | 2,485,723 | 80 | 397.7 | 98.81 | 5.51 |

|      |             |                          |           |           |    |       |       |      |
|------|-------------|--------------------------|-----------|-----------|----|-------|-------|------|
| S108 | Zhong103026 | Henan                    | YRR       | 2,371,442 | 80 | 379.4 | 98.84 | 5.26 |
| S109 | Zhong103028 | Henan                    | YRR       | 2,706,886 | 80 | 433.1 | 98.59 | 6.01 |
| S110 | Zhong103030 | Henan                    | YRR       | 2,677,363 | 80 | 428.4 | 98.90 | 5.94 |
| S111 | Zhong103032 | Henan                    | YRR       | 2,155,295 | 80 | 344.8 | 98.57 | 4.78 |
| S112 | Zhong103075 | Henan                    | YRR       | 3,009,454 | 80 | 481.5 | 98.89 | 6.68 |
| S113 | Zhong103164 | Henan                    | YRR       | 2,274,353 | 80 | 363.9 | 99.11 | 5.05 |
| S114 | Zhong103425 | Henan                    | YRR       | 2,506,229 | 80 | 401   | 98.98 | 5.56 |
| S115 | Zhong103297 | Henan                    | YRR       | 1,836,023 | 80 | 293.8 | 99.22 | 4.07 |
| S116 | Zhong109056 | Henan                    | YRR       | 1,665,370 | 80 | 266.5 | 98.89 | 3.70 |
| S117 | CPB12-1-7   | Henan                    | YRR       | 2,312,046 | 80 | 369.9 | 98.53 | 5.13 |
| S118 | CPB12-1-9   | Henan                    | YRR       | 2,482,277 | 80 | 397.2 | 98.96 | 5.51 |
| S119 | CPB12-2-7   | Henan                    | YRR       | 3,014,242 | 80 | 482.3 | 98.73 | 6.69 |
| S120 | 298         | the North of<br>Xinjiang | NIR       | 2,387,342 | 80 | 382   | 98.88 | 5.30 |
| S121 | Zhong602186 | Henan                    | YRR       | 1,864,278 | 80 | 298.3 | 99.11 | 4.14 |
| S122 | CG3020-1    | America                  | Amerasian | 3,186,780 | 80 | 509.9 | 99.25 | 7.07 |
| S123 | CG3020-3    | America                  | Amerasian | 2,435,262 | 80 | 389.6 | 99.09 | 5.40 |
| S124 | FM1735      | America                  | Amerasian | 1,885,782 | 80 | 301.7 | 99.31 | 4.18 |
| S125 | G2005       | Henan                    | YRR       | 1,491,430 | 80 | 238.6 | 99.05 | 3.31 |



|      |               |         |           |           |    |       |       |      |
|------|---------------|---------|-----------|-----------|----|-------|-------|------|
| S126 | Zhongzhimian2 | Beijing | YRR       | 2,870,246 | 80 | 459.2 | 99.20 | 6.37 |
| S127 | H109          | Henan   | YRR       | 2,660,223 | 80 | 425.6 | 98.97 | 5.90 |
| S128 | H559          | Henan   | YRR       | 2,089,191 | 80 | 334.3 | 99.35 | 4.64 |
| S129 | LIH33         | Henan   | YRR       | 1,900,420 | 80 | 304.1 | 99.04 | 4.22 |
| S130 | Phy-7         | America | Amerasian | 1,799,886 | 80 | 288   | 98.99 | 3.99 |
| S131 | STS458        | America | Amerasian | 1,592,488 | 80 | 254.8 | 98.90 | 3.53 |
| S132 | TM-1          | America | Amerasian | 2,108,321 | 80 | 337.3 | 99.12 | 4.68 |
| S133 | Aoshimian 6   | Beijing | YRR       | 2,220,893 | 80 | 355.3 | 98.15 | 4.93 |
| S134 | Baimian985    | Henan   | YRR       | 2,104,291 | 80 | 336.7 | 98.32 | 4.67 |
| S135 | Cang198       | Hebei   | YRR       | 3,052,698 | 80 | 488.4 | 99.37 | 6.77 |
| S136 | CBB           | Henan   | YRR       | 2,189,323 | 80 | 350.3 | 98.98 | 4.86 |
| S137 | CNB           | Henan   | YRR       | 1,962,345 | 80 | 314   | 98.34 | 4.35 |
| S138 | Deltapine14   | America | Amerasian | 2,295,588 | 80 | 367.3 | 99.45 | 5.09 |
| S139 | Deltapine15   | America | Amerasian | 2,248,562 | 80 | 359.8 | 98.36 | 4.99 |
| S140 | Fanmian3      | Henan   | YRR       | 2,701,339 | 80 | 432.2 | 98.97 | 5.99 |
| S141 | Ganzao109     | Jiangxi | YZRR      | 3,847,035 | 80 | 615.5 | 99.21 | 8.53 |
| S142 | Guoxinmian11  | Hebei   | YRR       | 1,823,838 | 80 | 291.8 | 98.20 | 4.05 |
| S143 | Han7860       | Hebei   | YRR       | 2,289,879 | 80 | 366.4 | 99.21 | 5.08 |
| S144 | Ji4025        | Hebei   | YRR       | 2,250,374 | 80 | 360.1 | 98.99 | 4.99 |

|      |               |          |           |           |    |       |       |      |
|------|---------------|----------|-----------|-----------|----|-------|-------|------|
| S145 | Jimian 26     | Shanxi   | YRR       | 2,299,667 | 80 | 367.9 | 99.40 | 5.10 |
| S146 | BM03          | Henan    | YRR       | 1,945,972 | 80 | 311.4 | 99.11 | 4.32 |
| S147 | Kelin098      | Henan    | YRR       | 1,994,201 | 80 | 319.1 | 98.72 | 4.42 |
| S148 | Liaomiao23    | Liaoning | NSER      | 2,356,994 | 80 | 377.1 | 99.18 | 5.23 |
| S149 | Liaomiao27    | Liaoning | NSER      | 2,804,089 | 80 | 448.7 | 99.03 | 6.22 |
| S150 | Liaomiao28    | Liaoning | NSER      | 2,352,265 | 80 | 376.4 | 99.01 | 5.22 |
| S151 | Lu05R59       | Shandong | YRR       | 2,285,561 | 80 | 365.7 | 99.08 | 5.07 |
| S152 | Lu7619        | Shandong | YRR       | 1,901,060 | 80 | 304.2 | 99.06 | 4.22 |
| S153 | Luyanmian17   | Shandong | YRR       | 2,032,447 | 80 | 325.2 | 98.98 | 4.51 |
| S154 | Luyanmian21   | Shandong | YRR       | 2,370,562 | 80 | 379.3 | 99.26 | 5.26 |
| S155 | Luyanmian28   | Shandong | YRR       | 2,609,036 | 80 | 417.4 | 99.15 | 5.79 |
| S156 | Luyanmian36   | Shandong | YRR       | 2,841,174 | 80 | 454.6 | 98.78 | 6.30 |
| S157 | Luyanmian38   | Shandong | YRR       | 2,574,112 | 80 | 411.9 | 99.14 | 5.71 |
| S158 | Miaobao21     | Shandong | YRR       | 2,802,634 | 80 | 448.4 | 99.15 | 6.22 |
| S159 | Renhe39       | Shandong | YRR       | 2,040,901 | 80 | 326.5 | 98.55 | 4.53 |
| S160 | Rihuimian6    | Anhui    | YZRR      | 2,146,860 | 80 | 343.5 | 99.02 | 4.76 |
| S161 | ShannongSF01  | Shandong | YRR       | 2,365,525 | 80 | 378.5 | 99.18 | 5.25 |
| S162 | Shan79        | Shanxi   | NIR       | 2,390,243 | 80 | 382.4 | 99.23 | 5.30 |
| S163 | Stoneville 2B | America  | Amerasian | 3,095,123 | 80 | 495.2 | 99.30 | 6.87 |

|      |             |                          |           |           |    |       |       |      |
|------|-------------|--------------------------|-----------|-----------|----|-------|-------|------|
| S164 | Xinmian 33B | America                  | Amerasian | 1,978,348 | 80 | 316.5 | 98.73 | 4.39 |
| S165 | Xinzhimian5 | Henan                    | YRR       | 2,260,016 | 80 | 361.6 | 99.04 | 5.01 |
| S166 | Yinhuashu   | Shandong                 | YRR       | 1,671,667 | 80 | 267.5 | 98.34 | 3.71 |
| S167 | You009      | Henan                    | YRR       | 1,694,312 | 80 | 271.1 | 98.36 | 3.76 |
| S168 | Zhong109    | Henan                    | YRR       | 2,024,945 | 80 | 324   | 98.67 | 4.49 |
| S169 | CRI17       | Henan                    | YRR       | 1,870,723 | 80 | 299.3 | 98.59 | 4.15 |
| S170 | CRI19       | Henan                    | YRR       | 2,235,614 | 80 | 357.7 | 98.87 | 4.96 |
| S171 | CRI43       | Henan                    | YRR       | 2,339,569 | 80 | 374.3 | 98.70 | 5.19 |
| S172 | CRI60       | Henan                    | YRR       | 2,071,966 | 80 | 331.5 | 99.16 | 4.60 |
| S173 | Zhong662    | Henan                    | YRR       | 2,608,463 | 80 | 417.4 | 99.01 | 5.79 |
| S174 | Zhong679    | the North of<br>Xinjiang | NIR       | 2,440,338 | 80 | 390.5 | 98.85 | 5.41 |
| S175 | Zhong69     | Henan                    | YRR       | 2,404,367 | 80 | 384.7 | 98.99 | 5.33 |
| S176 | Zhong800319 | Shandong                 | YRR       | 2,135,457 | 80 | 341.7 | 98.61 | 4.74 |
| S177 | CRI 94A915  | Henan                    | YRR       | 3,236,814 | 80 | 517.9 | 99.11 | 7.18 |
| S178 | CRI12       | Henan                    | YRR       | 2,184,636 | 80 | 349.5 | 98.88 | 4.85 |
| S179 | CRI35       | Henan                    | YRR       | 1,698,335 | 80 | 271.7 | 99.16 | 3.77 |
| S180 | CRI41       | Henan                    | YRR       | 2,046,761 | 80 | 327.5 | 98.56 | 4.54 |
| S181 | CRI45       | Henan                    | YRR       | 2,500,633 | 80 | 400.1 | 98.86 | 5.55 |

|      |                   |                          |           |           |    |       |       |      |
|------|-------------------|--------------------------|-----------|-----------|----|-------|-------|------|
| S182 | CRI49             | Henan                    | YRR       | 2,658,685 | 80 | 425.4 | 98.63 | 5.90 |
| S183 | CRI7              | Henan                    | YRR       | 2,239,455 | 80 | 358.3 | 98.92 | 4.97 |
| S184 | Zhongzhimian 8    | Beijing                  | YRR       | 2,481,233 | 80 | 397   | 98.88 | 5.50 |
| S185 | Zhongzhimian GD89 | Beijing                  | YRR       | 2,879,680 | 80 | 460.7 | 99.29 | 6.39 |
| S186 | Shan920346        | Shanxi                   | NIR       | 2,191,772 | 80 | 350.7 | 99.13 | 4.86 |
| S187 | XianIII9704       | America                  | Amerasian | 2,067,262 | 80 | 330.8 | 98.97 | 4.59 |
| S188 | US-1              | America                  | Amerasian | 2,597,533 | 80 | 415.6 | 99.08 | 5.76 |
| S189 | Kyrgyzstan cotton | Kyrgyzstan               | Amerasian | 1,723,817 | 80 | 275.8 | 99.08 | 3.82 |
| S190 | Bazhou5409        | the North of<br>Xinjiang | NIR       | 1,617,575 | 80 | 258.8 | 99.12 | 3.59 |
| S191 | Yumian1           | Sichuan                  | YZRR      | 1,489,456 | 80 | 238.3 | 98.88 | 3.30 |
| S192 | Huazhong910102    | Hubei                    | YZRR      | 2,686,230 | 80 | 429.8 | 99.45 | 5.96 |
| S193 | Israel cotton     | Israel                   | Amerasian | 1,934,199 | 80 | 309.5 | 98.82 | 4.29 |
| S194 | Ken6614           | the North of<br>Xinjiang | NIR       | 2,177,249 | 80 | 348.4 | 99.09 | 4.83 |
| S195 | Ken0074           | the North of<br>Xinjiang | NIR       | 1,877,754 | 80 | 300.4 | 99.10 | 4.17 |
| S196 | Chuan239-1        | Sichuan                  | YZRR      | 2,462,800 | 80 | 394   | 99.12 | 5.46 |
| S197 | Bamian3           | Sichuan                  | YZRR      | 2,400,963 | 80 | 384.2 | 99.11 | 5.33 |

|      |            |                          |      |           |    |       |       |      |
|------|------------|--------------------------|------|-----------|----|-------|-------|------|
| S198 | Chuan338   | Sichuan                  | YZRR | 3,409,881 | 80 | 545.6 | 99.23 | 7.57 |
| S199 | Chuan267   | Sichuan                  | YZRR | 2,419,796 | 80 | 387.2 | 99.04 | 5.37 |
| S200 | Chuan65    | Sichuan                  | YZRR | 2,286,267 | 80 | 365.8 | 98.49 | 5.07 |
| S201 | Chuanjian1 | Sichuan                  | YZRR | 2,431,550 | 80 | 389   | 99.33 | 5.39 |
| S202 | Xinluzao 2 | the North of<br>Xinjiang | NIR  | 2,358,522 | 80 | 377.4 | 99.38 | 5.23 |
| S203 | Xinluzao10 | the North of<br>Xinjiang | NIR  | 2,238,295 | 80 | 358.1 | 99.23 | 4.97 |
| S204 | Xinluzao12 | the North of<br>Xinjiang | NIR  | 2,746,908 | 80 | 439.5 | 98.87 | 6.09 |
| S205 | Xinluzao13 | the North of<br>Xinjiang | NIR  | 3,030,604 | 80 | 484.9 | 99.13 | 6.72 |
| S206 | Xinluzao15 | the North of<br>Xinjiang | NIR  | 2,618,205 | 80 | 418.9 | 99.21 | 5.81 |
| S207 | Xinluzao16 | the North of<br>Xinjiang | NIR  | 2,888,084 | 80 | 462.1 | 99.15 | 6.41 |
| S208 | Xinluzao17 | the North of<br>Xinjiang | NIR  | 1,969,069 | 80 | 315.1 | 98.84 | 4.37 |
| S209 | Xinluzao18 | the North of             | NIR  | 3,762,407 | 80 | 602   | 99.23 | 8.35 |

|      |            |                                      |      |           |    |       |       |      |
|------|------------|--------------------------------------|------|-----------|----|-------|-------|------|
| S210 | Xinluzao19 | Xinjiang<br>the North of<br>Xinjiang | NIR  | 2,177,805 | 80 | 348.4 | 99.05 | 4.83 |
| S211 | Xinluzao20 | the North of<br>Xinjiang             | NIR  | 2,802,952 | 80 | 448.5 | 99.42 | 6.22 |
| S212 | Xinluzao21 | the North of<br>Xinjiang             | NIR  | 2,051,858 | 80 | 328.3 | 99.21 | 4.55 |
| S213 | Xinluzao22 | the North of<br>Xinjiang             | NIR  | 2,173,493 | 80 | 347.8 | 98.79 | 4.82 |
| S214 | Xinluzao23 | the North of<br>Xinjiang             | NIR  | 3,089,548 | 80 | 494.3 | 98.98 | 6.85 |
| S215 | Xinluzao24 | the North of<br>Xinjiang             | NIR  | 2,535,770 | 80 | 405.7 | 99.33 | 5.63 |
| S216 | Yumian5    | Henan                                | YRR  | 3,314,343 | 80 | 530.3 | 99.16 | 7.35 |
| S217 | Yumian18   | Henan                                | YRR  | 3,364,121 | 80 | 538.3 | 99.18 | 7.46 |
| S218 | Yumian21   | Henan                                | YRR  | 2,284,159 | 80 | 365.5 | 99.11 | 5.07 |
| S219 | Yun1729    | Shanxi                               | YRR  | 2,054,954 | 80 | 328.8 | 99.33 | 4.56 |
| S220 | Zhemian11  | Zhejiang                             | YZRR | 1,856,073 | 80 | 297   | 99.29 | 4.12 |
| S221 | Tkuo       | the North of                         | NIR  | 2,017,749 | 80 | 322.8 | 99.18 | 4.48 |

|      |               |                                      |     |           |    |       |       |      |
|------|---------------|--------------------------------------|-----|-----------|----|-------|-------|------|
| S222 | Bo425         | Xinjiang<br>the North of<br>Xinjiang | NIR | 2,932,437 | 80 | 469.2 | 99.08 | 6.51 |
| S223 | Xinluzhong 60 | the South of<br>Xinjiang             | NIR | 3,670,948 | 80 | 587.4 | 99.44 | 8.14 |
| S224 | Ken27-3       | the North of<br>Xinjiang             | NIR | 1,979,731 | 80 | 316.8 | 98.70 | 4.39 |
| S225 | B-3           | the South of<br>Xinjiang             | NIR | 2,633,165 | 80 | 421.3 | 99.29 | 5.84 |
| S226 | Xinluzao25    | the North of<br>Xinjiang             | NIR | 3,383,108 | 80 | 541.3 | 99.31 | 7.51 |
| S227 | Xinluzao26    | the South of<br>Xinjiang             | NIR | 2,214,142 | 80 | 354.3 | 99.18 | 4.91 |
| S228 | Xinluzao27    | the North of<br>Xinjiang             | NIR | 1,528,067 | 80 | 244.5 | 98.71 | 3.39 |
| S229 | Xinluzao28    | the North of<br>Xinjiang             | NIR | 2,637,433 | 80 | 422   | 98.93 | 5.85 |
| S230 | Xinluzao29    | the North of<br>Xinjiang             | NIR | 1,991,211 | 80 | 318.6 | 99.06 | 4.42 |

|      |            |                          |     |           |    |       |       |      |
|------|------------|--------------------------|-----|-----------|----|-------|-------|------|
| S231 | Xinluzao30 | the North of<br>Xinjiang | NIR | 1,791,761 | 80 | 286.7 | 98.84 | 3.98 |
| S232 | Xinluzao32 | the North of<br>Xinjiang | NIR | 2,254,336 | 80 | 360.7 | 98.73 | 5.00 |
| S233 | Xinluzao33 | the North of<br>Xinjiang | NIR | 3,041,271 | 80 | 486.6 | 98.90 | 6.75 |
| S234 | Xinluzao34 | the North of<br>Xinjiang | NIR | 1,951,565 | 80 | 312.3 | 98.94 | 4.33 |
| S235 | Xinluzao35 | the North of<br>Xinjiang | NIR | 2,734,383 | 80 | 437.5 | 99.10 | 6.07 |
| S236 | Xinluzao37 | the North of<br>Xinjiang | NIR | 2,640,335 | 80 | 422.5 | 98.97 | 5.86 |
| S237 | Xinluzao38 | the North of<br>Xinjiang | NIR | 3,745,405 | 80 | 599.3 | 98.93 | 8.31 |
| S238 | Xinluzao39 | the North of<br>Xinjiang | NIR | 2,375,896 | 80 | 380.1 | 99.02 | 5.27 |
| S239 | Xinluzao40 | the North of<br>Xinjiang | NIR | 2,908,309 | 80 | 465.3 | 99.09 | 6.45 |
| S240 | Xinluzao41 | the South of             | NIR | 4,427,036 | 80 | 708.3 | 99.12 | 9.82 |



|      |             |                                      |     |           |    |       |       |      |
|------|-------------|--------------------------------------|-----|-----------|----|-------|-------|------|
| S241 | Xinluzao46  | Xinjiang<br>the North of<br>Xinjiang | NIR | 3,514,635 | 80 | 562.3 | 99.20 | 7.80 |
| S242 | Xinluzao47  | the North of<br>Xinjiang             | NIR | 2,189,811 | 80 | 350.4 | 99.25 | 4.86 |
| S243 | Xinluzao48  | the North of<br>Xinjiang             | NIR | 1,921,437 | 80 | 307.4 | 98.93 | 4.26 |
| S244 | Xinluzao49  | the North of<br>Xinjiang             | NIR | 3,132,896 | 80 | 501.3 | 99.31 | 6.95 |
| S245 | Xinluzao50  | the North of<br>Xinjiang             | NIR | 3,322,562 | 80 | 531.6 | 99.20 | 7.37 |
| S246 | Xinluzao51  | the North of<br>Xinjiang             | NIR | 2,944,507 | 80 | 471.1 | 99.22 | 6.53 |
| S247 | Xinluzhong1 | the South of<br>Xinjiang             | NIR | 2,331,282 | 80 | 373   | 98.87 | 5.17 |
| S248 | Xinluzhong3 | the South of<br>Xinjiang             | NIR | 2,688,261 | 80 | 430.1 | 98.29 | 5.96 |
| S249 | Xinluzhong4 | the North of<br>Xinjiang             | NIR | 2,658,473 | 80 | 425.4 | 99.03 | 5.90 |

|      |              |                          |     |           |    |       |       |      |
|------|--------------|--------------------------|-----|-----------|----|-------|-------|------|
| S250 | Xinluzhong5  | the North of<br>Xinjiang | NIR | 3,186,587 | 80 | 509.9 | 99.24 | 7.07 |
| S251 | Xinluzhong6  | the South of<br>Xinjiang | NIR | 1,822,421 | 80 | 291.6 | 99.14 | 4.04 |
| S252 | Xinluzhong7  | the South of<br>Xinjiang | NIR | 2,521,645 | 80 | 403.5 | 99.35 | 5.59 |
| S253 | Xinluzhong8  | the South of<br>Xinjiang | NIR | 4,232,214 | 80 | 677.2 | 99.38 | 9.39 |
| S254 | Xinluzhong9  | the South of<br>Xinjiang | NIR | 3,320,197 | 80 | 531.2 | 99.20 | 7.37 |
| S255 | Xinluzhong10 | the South of<br>Xinjiang | NIR | 2,411,200 | 80 | 385.8 | 98.85 | 5.35 |
| S256 | Xinluzhong12 | the South of<br>Xinjiang | NIR | 3,451,116 | 80 | 552.2 | 99.25 | 7.66 |
| S257 | Xinluzhong13 | the South of<br>Xinjiang | NIR | 2,176,758 | 80 | 348.3 | 99.21 | 4.83 |
| S258 | Xinluzhong14 | the South of<br>Xinjiang | NIR | 2,059,834 | 80 | 329.6 | 98.85 | 4.57 |
| S259 | Xinluzhong15 | the South of             | NIR | 2,393,228 | 80 | 382.9 | 99.11 | 5.31 |

|      |              |                                      |     |           |    |       |       |      |
|------|--------------|--------------------------------------|-----|-----------|----|-------|-------|------|
| S260 | Xinluzhong16 | Xinjiang<br>the South of<br>Xinjiang | NIR | 2,932,213 | 80 | 469.2 | 99.20 | 6.51 |
| S261 | Xinluzhong17 | the South of<br>Xinjiang             | NIR | 2,246,577 | 80 | 359.5 | 99.10 | 4.98 |
| S262 | Xinluzhong19 | the South of<br>Xinjiang             | NIR | 1,977,391 | 80 | 316.4 | 99.10 | 4.39 |
| S263 | Xinluzhong20 | the North of<br>Xinjiang             | NIR | 2,131,218 | 80 | 341   | 98.89 | 4.73 |
| S264 | Xinluzhong21 | the South of<br>Xinjiang             | NIR | 3,028,797 | 80 | 484.6 | 99.16 | 6.72 |
| S265 | Xinluzhong22 | the South of<br>Xinjiang             | NIR | 3,354,892 | 80 | 536.8 | 99.24 | 7.44 |
| S266 | Xinluzhong26 | the South of<br>Xinjiang             | NIR | 3,099,715 | 80 | 496   | 99.11 | 6.88 |
| S267 | Xinluzhong27 | the South of<br>Xinjiang             | NIR | 2,504,491 | 80 | 400.7 | 99.22 | 5.56 |
| S268 | Xinluzhong28 | the South of<br>Xinjiang             | NIR | 2,410,563 | 80 | 385.7 | 99.18 | 5.35 |

|      |               |                          |           |           |    |       |       |      |
|------|---------------|--------------------------|-----------|-----------|----|-------|-------|------|
| S269 | Xinluzhong30  | the South of<br>Xinjiang | NIR       | 3,584,085 | 80 | 573.5 | 99.28 | 7.95 |
| S270 | Xinluzhong32  | the South of<br>Xinjiang | NIR       | 1,899,631 | 80 | 303.9 | 99.17 | 4.21 |
| S271 | Xinluzhong34  | the South of<br>Xinjiang | NIR       | 3,134,370 | 80 | 501.5 | 99.21 | 6.95 |
| S272 | Xinluzhong35  | the South of<br>Xinjiang | NIR       | 1,751,161 | 80 | 280.2 | 99.17 | 3.89 |
| S273 | Xinluzhong40  | the South of<br>Xinjiang | NIR       | 3,524,903 | 80 | 564   | 98.91 | 7.82 |
| S274 | Xinluzhong41  | the South of<br>Xinjiang | NIR       | 2,400,664 | 80 | 384.1 | 99.25 | 5.33 |
| S275 | Xinluzhong45  | the South of<br>Xinjiang | NIR       | 2,428,727 | 80 | 388.6 | 99.35 | 5.39 |
| S276 | Xinluzhong46  | the South of<br>Xinjiang | NIR       | 3,785,837 | 80 | 605.7 | 99.49 | 8.40 |
| S277 | Xinluzhong47  | the South of<br>Xinjiang | NIR       | 2,372,994 | 80 | 379.7 | 99.15 | 5.26 |
| S278 | Kangcaoganlin | America                  | Amerasian | 2,864,029 | 80 | 458.2 | 99.17 | 6.35 |

|      |                      |                          |      |           |    |       |       |      |
|------|----------------------|--------------------------|------|-----------|----|-------|-------|------|
| S279 | Jiangyin1            | Yangtze River            | YZRR | 2,109,763 | 80 | 337.6 | 99.07 | 4.68 |
| S280 | Huihe36              | the South of<br>Xinjiang | NIR  | 1,359,385 | 80 | 217.5 | 98.75 | 3.02 |
| S281 | Jinken1042           | the North of<br>Xinjiang | NIR  | 2,171,821 | 80 | 347.5 | 98.90 | 4.82 |
| S282 | Guoxinmian9          | Hebei                    | YRR  | 2,687,027 | 80 | 429.9 | 99.42 | 5.96 |
| S283 | Junmian1             | the South of<br>Xinjiang | NIR  | 2,579,292 | 80 | 412.7 | 99.29 | 5.72 |
| S284 | Huiyuan717           | the North of<br>Xinjiang | NIR  | 3,459,289 | 80 | 553.5 | 99.43 | 7.67 |
| S285 | Yunzao219            | Shanxi                   | YRR  | 2,763,682 | 80 | 442.2 | 99.25 | 6.13 |
| S286 | Yunzao33-356         | Shanxi                   | YRR  | 1,792,808 | 80 | 286.8 | 99.31 | 3.98 |
| S287 | Jinmian2             | Liaoning                 | NSER | 2,832,725 | 80 | 453.2 | 99.11 | 6.28 |
| S288 | Chaoyangmian2        | Liaoning                 | NSER | 1,942,406 | 80 | 310.8 | 99.23 | 4.31 |
| S289 | Dunhuang77-116       | Gansu                    | NIR  | 2,992,599 | 80 | 478.8 | 98.99 | 6.64 |
| S290 | Ganmian4             | Gansu                    | NIR  | 3,848,095 | 80 | 615.7 | 99.26 | 8.54 |
| S291 | Guannongzao C-50     | Liaoning                 | NSER | 3,032,659 | 80 | 485.2 | 98.99 | 6.73 |
| S292 | Guannongchangzao B14 | Liaoning                 | NSER | 2,551,615 | 80 | 408.3 | 99.06 | 5.66 |
| S293 | Yanzao1              | Jiangsu                  | YZRR | 3,568,903 | 80 | 571   | 99.24 | 7.92 |

|      |                  |                          |           |           |    |       |       |      |
|------|------------------|--------------------------|-----------|-----------|----|-------|-------|------|
| S294 | Yanzao2          | Jiangsu                  | YZRR      | 3,246,007 | 80 | 519.4 | 99.37 | 7.20 |
| S295 | Jinmian6         | Liaoning                 | NSER      | 2,963,188 | 80 | 474.1 | 98.81 | 6.57 |
| S296 | Jinken69-2       | the North of<br>Xinjiang | NIR       | 2,467,762 | 80 | 394.8 | 99.23 | 5.47 |
| S297 | Jinken148-39     | the North of<br>Xinjiang | NIR       | 2,906,196 | 80 | 465   | 99.13 | 6.45 |
| S298 | Zhuangjiahuan102 | the North of<br>Xinjiang | NIR       | 2,175,629 | 80 | 348.1 | 99.26 | 4.83 |
| S299 | Yinshan4         | Henan                    | YRR       | 3,338,133 | 80 | 534.1 | 98.94 | 7.41 |
| S300 | Ejing1           | Hebei                    | YRR       | 3,383,330 | 80 | 541.3 | 99.06 | 7.51 |
| S301 | Simian3          | Sichuan                  | YZRR      | 2,766,398 | 80 | 442.6 | 99.21 | 6.14 |
| S302 | Stoneville 4B    | America                  | Amerasian | 1,749,809 | 80 | 280   | 98.83 | 3.88 |
| S303 | Jimian10         | Hebei                    | YRR       | 2,026,299 | 80 | 324.2 | 99.00 | 4.50 |
| S304 | Jimian11         | Hebei                    | YRR       | 2,052,221 | 80 | 328.4 | 99.25 | 4.55 |
| S305 | Jimian12         | Hebei                    | YRR       | 2,052,712 | 80 | 328.4 | 99.21 | 4.55 |
| S306 | Jimian16         | Hubei                    | YZRR      | 2,106,206 | 80 | 337   | 99.33 | 4.67 |
| S307 | Jimian17         | Hubei                    | YZRR      | 2,883,841 | 80 | 461.4 | 99.35 | 6.40 |
| S308 | Sumian4          | Jiangsu                  | YZRR      | 1,982,137 | 80 | 317.1 | 98.97 | 4.40 |
| S309 | Ekangmian2       | Hebei                    | YRR       | 3,794,508 | 80 | 607.1 | 99.21 | 8.42 |

|      |                |          |           |           |    |       |       |      |
|------|----------------|----------|-----------|-----------|----|-------|-------|------|
| S310 | Ekangmian3     | Hubei    | YZRR      | 4,098,607 | 80 | 655.8 | 99.01 | 9.09 |
| S311 | Ekangmian6     | Hubei    | YZRR      | 2,175,132 | 80 | 348   | 99.09 | 4.83 |
| S312 | Edaimian       | Hebei    | YRR       | 1,614,903 | 80 | 258.4 | 98.88 | 3.58 |
| S313 | Xuzhou142      | Jiangsu  | YZRR      | 2,402,323 | 80 | 384.4 | 99.02 | 5.33 |
| S314 | Sumian9        | Jiangsu  | YZRR      | 2,571,488 | 80 | 411.4 | 98.96 | 5.70 |
| S315 | Sumian12       | Jiangsu  | YZRR      | 1,907,942 | 80 | 305.3 | 99.20 | 4.23 |
| S316 | Sukang191      | Jiangsu  | YZRR      | 2,194,639 | 80 | 351.1 | 99.10 | 4.87 |
| S317 | Gangmian1      | Hebei    | YRR       | 1,967,668 | 80 | 314.8 | 99.22 | 4.37 |
| S318 | Gangmian2      | Hebei    | YRR       | 2,801,620 | 80 | 448.3 | 99.27 | 6.22 |
| S319 | Coker 201      | America  | Amerasian | 3,019,394 | 80 | 483.1 | 99.13 | 6.70 |
| S320 | Daihongdai     | Hunan    | YZRR      | 1,968,229 | 80 | 314.9 | 98.76 | 4.37 |
| S321 | Yishuhong      | Hubei    | YZRR      | 2,679,883 | 80 | 428.8 | 99.18 | 5.95 |
| S322 | Bomian1        | Shandong | YRR       | 2,521,232 | 80 | 403.4 | 99.29 | 5.59 |
| S323 | Kemian4        | Jiangsu  | YZRR      | 3,019,528 | 80 | 483.1 | 99.20 | 6.70 |
| S324 | Ganmian11      | Jiangxi  | YZRR      | 3,187,679 | 80 | 510   | 99.27 | 7.07 |
| S325 | Ganmian12      | Jiangxi  | YZRR      | 3,288,790 | 80 | 526.2 | 99.39 | 7.30 |
| S326 | Xianmian13     | Hunan    | YZRR      | 2,172,337 | 80 | 347.6 | 99.20 | 4.82 |
| S327 | Yapengmian     | Hubei    | YZRR      | 2,000,487 | 80 | 320.1 | 99.30 | 4.44 |
| S328 | Jijiaodezimian | Jiangsu  | YZRR      | 2,308,072 | 80 | 369.3 | 99.27 | 5.12 |

|      |                  |            |           |           |    |       |       |      |
|------|------------------|------------|-----------|-----------|----|-------|-------|------|
| S329 | 611bo            | Tajikistan | Amerasian | 2,427,735 | 80 | 388.4 | 99.21 | 5.39 |
| S330 | Annong121        | Anhui      | YZRR      | 1,996,145 | 80 | 319.4 | 99.12 | 4.43 |
| S331 | Deltapine16      | America    | Amerasian | 1,548,695 | 80 | 247.8 | 99.19 | 3.44 |
| S332 | Delfos 531       | America    | Amerasian | 2,320,456 | 80 | 371.3 | 99.23 | 5.15 |
| S333 | Dunmian1         | Gansu      | NIR       | 3,368,716 | 80 | 539   | 99.23 | 7.47 |
| S334 | Dunmian2         | Gansu      | NIR       | 2,984,132 | 80 | 477.5 | 99.28 | 6.62 |
| S335 | Ganmian2         | Jiangxi    | YZRR      | 2,656,531 | 80 | 425   | 99.47 | 5.89 |
| S336 | Ganmina3         | Jiangxi    | YZRR      | 3,087,716 | 80 | 494   | 99.32 | 6.85 |
| S337 | Ganmian47        | Jiangxi    | YZRR      | 2,202,092 | 80 | 352.3 | 99.49 | 4.89 |
| S338 | Guangyedaizimina | America    | Amerasian | 2,121,541 | 80 | 339.4 | 99.44 | 4.71 |
| S339 | Ji668            | Hebei      | YRR       | 2,883,048 | 80 | 461.3 | 99.43 | 6.40 |
| S340 | Jimian25         | Hebei      | YRR       | 2,128,188 | 80 | 340.5 | 99.14 | 4.72 |
| S341 | Jinmian5         | Liaoning   | NSER      | 2,982,497 | 80 | 477.2 | 99.28 | 6.62 |
| S342 | Keke1543         | Uzbekistan | Amerasian | 1,904,328 | 80 | 304.7 | 99.10 | 4.22 |
| S343 | Ningmian1        | Jiangsu    | YZRR      | 3,199,904 | 80 | 512   | 99.22 | 7.10 |
| S344 | Ningmian22       | Jiangsu    | YZRR      | 3,327,208 | 80 | 532.4 | 99.23 | 7.38 |
| S345 | Nongda94-7       | Hebei      | YRR       | 2,443,298 | 80 | 390.9 | 99.25 | 5.42 |
| S346 | Nongdamian8      | Hebei      | YRR       | 3,551,974 | 80 | 568.3 | 99.31 | 7.88 |
| S347 | Shumian1         | Sichuan    | YZRR      | 4,252,235 | 80 | 680.4 | 98.75 | 9.43 |



|      |             |                          |      |           |    |       |       |      |
|------|-------------|--------------------------|------|-----------|----|-------|-------|------|
| S348 | Sumian1     | Jiangsu                  | YZRR | 1,951,194 | 80 | 312.2 | 99.28 | 4.33 |
| S349 | Sumian22    | Jiangsu                  | YZRR | 2,417,921 | 80 | 386.9 | 99.25 | 5.36 |
| S350 | Xiangmian10 | Hunan                    | YZRR | 2,595,860 | 80 | 415.3 | 99.22 | 5.76 |
| S351 | Xuzhou219   | Jiangsu                  | YZRR | 3,034,410 | 80 | 485.5 | 99.28 | 6.73 |
| S352 | Yinshan8    | Henan                    | YRR  | 2,740,436 | 80 | 438.5 | 99.27 | 6.08 |
| S353 | Yumian1     | Henan                    | YRR  | 2,839,258 | 80 | 454.3 | 99.09 | 6.30 |
| S354 | Yumian2     | Henan                    | YRR  | 4,474,962 | 80 | 716   | 99.35 | 9.93 |
| S355 | Xinluzao53  | the North of<br>Xinjiang | NIR  | 2,923,626 | 80 | 467.8 | 99.05 | 6.49 |

**Supplementary Table 2:** List of all primers used in this study.

| Primer         | Sequence (5'~ 3')         |
|----------------|---------------------------|
| QGb_D03G1316-1 | TTTCTCGCTTGGTTTCCCG       |
| QGb_D03G1316-2 | GGCTGAGGTGAAACGAGGTC      |
| QGb_D03G1318-1 | TGCTTTACTCTTCGGGGACG      |
| QGb_D03G1318-2 | GCGTACACCATGACAGCCAA      |
| QGb_D03G1319-1 | GCATGATCTTAATGCTTCTGTTGTG |
| QGb_D03G1319-2 | CCGAGTTCCCAACATTTCCG      |

|                |                                      |
|----------------|--------------------------------------|
| QGh_D03G1325-1 | TAAAGCCAAAACCGAATCCACAA              |
| QGh_D03G1325-2 | CTGAATTGCCTCTGATTTGGCG               |
| QGh_D03G1326-1 | GGAGGAATGGAGGCGAACAA                 |
| QGh_D03G1326-2 | ATATGCCGACGAGAGCGAAG                 |
| QGh_D03G1328-1 | TTGTGAAATGTTCGAAATAAAGCTG            |
| QGh_D03G1328-2 | TCAACACTTGCACCCTTGC                  |
| QGh_D03G1330-1 | GAGAGCGTGCGCAGGTAATG                 |
| QGh_D03G1330-2 | CCACATTTTTCCGTGCTCTTGT               |
| QGh_D03G1332-1 | TATAGTGGCGCACAAATGCC                 |
| QGh_D03G1332-2 | AACCTGTCCAAGTCCCCCTTT                |
| QGh_D03G1337-1 | ACAACAACCCCATTTGCTTGC                |
| QGh_D03G1337-2 | CTTTTCTCTCCGGCCACTGT                 |
| QGh_D03G1338-1 | TTGTGAGGAGGGTCCAAAC                  |
| QGh_D03G1338-2 | GCGATACCCTGTCCGCTTTA                 |
| QGh_D03G1339-1 | CTCGTCATCCTCTTCGTCCTG                |
| QGh_D03G1339-2 | AGGAAGATCGGCTCCTTTGG                 |
| Actin-F        | ATCCTCCGTCTTGACCTTG                  |
| Actin-R        | TGTCCGTCAGGCAACTCAT                  |
| D03G1338-1     | CACGGGGGACTCTAGAATGGGGACGGGAACATCGAG |

D03G1338-2

GATCGGGGAAATTCGAGCTCTCAATCCATTAGTTTGTATCTTTTC

**Supplementary Table 3:** Sequencing statistics of CRI50, CRI60 and 198 F2 families.

| sample | clean reads | mapped reads | mapping<br>rate(%) | Sequence depth<br>coverage | Genome base<br>coverage(%) |
|--------|-------------|--------------|--------------------|----------------------------|----------------------------|
| Z50R_1 | 48,342,150  | 48,215,113   | 99.74              | 32.05                      | 9.12                       |
| Z60R_1 | 50,936,242  | 50,814,375   | 99.76              | 34.57                      | 9.01                       |
| 07_12  | 6,319,996   | 6,312,306    | 99.88              | 12.78                      | 2.60                       |
| 07_14  | 8,787,230   | 8,776,014    | 99.87              | 14.16                      | 3.41                       |
| 07_17  | 8,107,224   | 8,099,139    | 99.90              | 13.56                      | 3.35                       |
| 07_19  | 7,216,494   | 7,209,278    | 99.90              | 13.59                      | 2.94                       |
| 07_20  | 8,234,824   | 8,226,406    | 99.90              | 13.69                      | 3.26                       |
| 07_22  | 6,801,644   | 6,793,714    | 99.88              | 12.29                      | 3.02                       |
| 07_26  | 6,849,232   | 6,839,084    | 99.85              | 12.31                      | 2.94                       |
| 07_27  | 7,570,282   | 7,560,881    | 99.88              | 13.61                      | 3.15                       |
| 07_31  | 6,747,348   | 6,734,637    | 99.81              | 11.81                      | 2.95                       |
| 07_35  | 8,322,650   | 8,312,705    | 99.88              | 13.12                      | 3.54                       |
| 07_36  | 7,921,566   | 7,911,813    | 99.88              | 13.74                      | 3.24                       |

|       |           |           |       |       |      |
|-------|-----------|-----------|-------|-------|------|
| 07_38 | 8,738,552 | 8,729,461 | 99.90 | 13.94 | 3.41 |
| 07_39 | 5,952,952 | 5,946,306 | 99.89 | 11.92 | 2.73 |
| 07_41 | 6,533,484 | 6,524,705 | 99.87 | 12.01 | 3.01 |
| 07_43 | 6,788,068 | 6,774,594 | 99.80 | 12.68 | 3.03 |
| 07_45 | 7,093,526 | 7,084,262 | 99.87 | 12.63 | 3.11 |
| 07_46 | 6,589,362 | 6,580,010 | 99.86 | 12.00 | 3.03 |
| 07_47 | 6,084,806 | 6,078,043 | 99.89 | 12.09 | 2.79 |
| 07_8  | 8,380,086 | 8,371,060 | 99.89 | 14.17 | 3.40 |
| 10_10 | 6,825,000 | 6,797,630 | 99.60 | 11.58 | 3.17 |
| 10_14 | 7,563,864 | 7,531,775 | 99.58 | 11.56 | 3.36 |
| 10_15 | 7,417,502 | 7,383,035 | 99.54 | 11.56 | 3.31 |
| 10_22 | 7,911,068 | 7,869,588 | 99.48 | 12.75 | 3.29 |
| 10_23 | 7,763,266 | 7,671,887 | 98.82 | 12.09 | 3.29 |
| 10_31 | 7,435,392 | 7,402,128 | 99.55 | 12.45 | 3.12 |
| 10_32 | 7,553,458 | 7,493,960 | 99.21 | 12.29 | 3.22 |
| 10_33 | 7,891,318 | 7,858,046 | 99.58 | 13.01 | 3.27 |
| 10_34 | 7,075,898 | 7,049,385 | 99.63 | 12.09 | 3.05 |
| 10_35 | 6,407,486 | 6,383,103 | 99.62 | 11.37 | 3.01 |
| 10_36 | 7,220,572 | 7,189,573 | 99.57 | 10.67 | 3.60 |

|       |           |           |       |       |      |
|-------|-----------|-----------|-------|-------|------|
| 10_37 | 2,858,294 | 2,855,269 | 99.89 | 6.86  | 1.79 |
| 10_38 | 7,934,692 | 7,892,230 | 99.46 | 13.34 | 3.27 |
| 10_39 | 7,840,472 | 7,800,726 | 99.49 | 13.19 | 3.31 |
| 10_4  | 6,024,406 | 5,986,876 | 99.38 | 11.40 | 2.84 |
| 10_40 | 7,341,772 | 7,309,309 | 99.56 | 12.29 | 3.21 |
| 10_41 | 7,826,518 | 7,793,820 | 99.58 | 13.64 | 3.18 |
| 10_42 | 7,053,206 | 7,023,174 | 99.57 | 12.81 | 3.01 |
| 10_43 | 6,281,480 | 6,253,223 | 99.55 | 11.88 | 2.78 |
| 10_44 | 7,267,012 | 7,234,795 | 99.56 | 14.10 | 2.94 |
| 10_45 | 6,925,066 | 6,899,773 | 99.63 | 12.47 | 3.04 |
| 10_46 | 5,499,546 | 5,480,220 | 99.65 | 11.27 | 2.56 |
| 10_5  | 6,806,880 | 6,781,912 | 99.63 | 13.20 | 2.85 |
| 10_9  | 2,596,066 | 2,593,029 | 99.88 | 6.30  | 1.60 |
| 11_11 | 6,517,292 | 6,507,332 | 99.85 | 11.11 | 3.01 |
| 11_12 | 6,611,430 | 6,604,105 | 99.89 | 11.78 | 3.07 |
| 11_14 | 6,605,414 | 6,587,458 | 99.73 | 11.60 | 3.01 |
| 11_17 | 6,851,794 | 6,838,270 | 99.80 | 12.90 | 3.03 |
| 11_18 | 7,257,164 | 7,247,593 | 99.87 | 12.93 | 3.11 |
| 11_20 | 7,070,088 | 7,061,948 | 99.88 | 12.99 | 3.11 |

|       |           |           |       |       |      |
|-------|-----------|-----------|-------|-------|------|
| 11_21 | 7,100,582 | 7,090,825 | 99.86 | 12.80 | 3.13 |
| 11_22 | 8,151,998 | 8,142,143 | 99.88 | 13.01 | 3.37 |
| 11_23 | 6,976,334 | 6,968,392 | 99.89 | 12.63 | 2.98 |
| 11_24 | 6,383,992 | 6,375,872 | 99.87 | 11.84 | 3.04 |
| 11_25 | 6,480,604 | 6,473,506 | 99.89 | 11.04 | 3.07 |
| 11_26 | 7,224,250 | 7,209,111 | 99.79 | 12.43 | 3.18 |
| 11_27 | 7,621,906 | 7,611,412 | 99.86 | 12.63 | 3.30 |
| 11_28 | 7,088,818 | 7,080,700 | 99.89 | 12.46 | 3.07 |
| 11_29 | 6,156,254 | 6,146,210 | 99.84 | 12.81 | 2.84 |
| 11_3  | 6,932,192 | 6,900,055 | 99.54 | 12.05 | 3.07 |
| 11_30 | 7,540,314 | 7,529,417 | 99.86 | 12.82 | 3.20 |
| 11_31 | 6,957,060 | 6,944,108 | 99.81 | 12.09 | 3.09 |
| 11_32 | 6,620,826 | 6,612,297 | 99.87 | 11.97 | 2.98 |
| 11_33 | 6,807,018 | 6,798,773 | 99.88 | 12.59 | 3.09 |
| 11_34 | 8,486,312 | 8,476,463 | 99.88 | 13.46 | 3.62 |
| 11_36 | 6,557,034 | 6,550,114 | 99.89 | 12.45 | 3.00 |
| 11_37 | 7,666,008 | 7,656,119 | 99.87 | 12.37 | 3.47 |
| 11_39 | 6,383,786 | 6,376,527 | 99.89 | 12.17 | 2.99 |
| 11_4  | 7,155,982 | 7,128,361 | 99.61 | 11.59 | 3.29 |

|       |           |           |       |       |      |
|-------|-----------|-----------|-------|-------|------|
| 11_40 | 6,392,150 | 6,385,009 | 99.89 | 11.41 | 3.04 |
| 11_5  | 7,345,622 | 7,296,069 | 99.33 | 12.72 | 3.05 |
| 11_7  | 6,220,524 | 6,212,867 | 99.88 | 11.41 | 2.93 |
| 11_8  | 6,561,840 | 6,551,554 | 99.84 | 11.91 | 3.05 |
| 11_9  | 6,748,968 | 6,741,858 | 99.89 | 13.01 | 2.91 |
| 12_10 | 6,105,770 | 6,099,510 | 99.90 | 11.82 | 2.82 |
| 12_11 | 7,240,036 | 7,230,026 | 99.86 | 14.07 | 3.01 |
| 12_15 | 6,601,122 | 6,593,601 | 99.89 | 12.45 | 3.05 |
| 12_16 | 5,606,580 | 5,595,194 | 99.80 | 11.48 | 2.71 |
| 12_17 | 7,295,570 | 7,287,149 | 99.88 | 13.11 | 3.14 |
| 12_20 | 6,058,892 | 6,037,268 | 99.64 | 12.82 | 2.77 |
| 12_21 | 6,534,290 | 6,523,586 | 99.84 | 12.05 | 2.74 |
| 12_23 | 6,171,106 | 6,161,523 | 99.84 | 11.15 | 2.83 |
| 12_24 | 5,641,784 | 5,635,360 | 99.89 | 10.75 | 2.75 |
| 12_26 | 5,893,076 | 5,886,146 | 99.88 | 12.19 | 2.62 |
| 12_27 | 6,381,168 | 6,372,987 | 99.87 | 11.16 | 2.84 |
| 12_28 | 6,191,734 | 6,174,853 | 99.73 | 11.57 | 2.84 |
| 12_30 | 5,879,472 | 5,868,633 | 99.82 | 11.03 | 2.70 |
| 12_31 | 6,140,240 | 6,132,435 | 99.87 | 11.65 | 2.86 |

|       |           |           |       |       |      |
|-------|-----------|-----------|-------|-------|------|
| 12_32 | 6,283,972 | 6,273,702 | 99.84 | 11.15 | 2.85 |
| 12_33 | 6,880,592 | 6,867,539 | 99.81 | 12.33 | 3.06 |
| 12_34 | 5,762,510 | 5,753,946 | 99.85 | 10.91 | 2.80 |
| 12_36 | 7,057,716 | 7,051,634 | 99.91 | 13.02 | 2.89 |
| 12_37 | 5,264,966 | 5,259,880 | 99.90 | 10.82 | 2.45 |
| 12_38 | 4,745,946 | 4,740,583 | 99.89 | 9.86  | 2.46 |
| 12_39 | 5,298,688 | 5,292,879 | 99.89 | 10.33 | 2.56 |
| 12_40 | 6,308,096 | 6,301,507 | 99.90 | 11.16 | 2.91 |
| 12_7  | 7,204,822 | 7,195,266 | 99.87 | 12.94 | 3.16 |
| 12_9  | 6,339,394 | 6,330,296 | 99.86 | 12.32 | 2.96 |
| 15_10 | 6,685,328 | 6,673,163 | 99.82 | 11.73 | 3.06 |
| 15_12 | 6,739,884 | 6,734,315 | 99.92 | 11.99 | 3.07 |
| 15_13 | 5,218,404 | 5,214,063 | 99.92 | 10.16 | 2.62 |
| 15_15 | 5,947,952 | 5,940,410 | 99.87 | 11.01 | 2.86 |
| 15_16 | 6,019,646 | 6,012,685 | 99.88 | 11.65 | 2.82 |
| 15_17 | 6,137,474 | 6,130,820 | 99.89 | 11.15 | 2.91 |
| 15_21 | 6,255,714 | 6,247,614 | 99.87 | 11.81 | 2.86 |
| 15_22 | 6,070,158 | 6,063,787 | 99.90 | 11.62 | 2.80 |
| 15_27 | 5,097,938 | 5,092,063 | 99.88 | 10.10 | 2.50 |



|       |           |           |       |       |      |
|-------|-----------|-----------|-------|-------|------|
| 15_29 | 4,769,366 | 4,765,171 | 99.91 | 10.29 | 2.41 |
| 15_3  | 5,908,418 | 5,901,052 | 99.88 | 10.52 | 2.83 |
| 15_30 | 6,400,228 | 6,393,896 | 99.90 | 12.05 | 2.89 |
| 15_31 | 5,552,642 | 5,547,695 | 99.91 | 11.20 | 2.59 |
| 15_33 | 6,394,862 | 6,387,885 | 99.89 | 11.81 | 2.88 |
| 15_38 | 6,737,668 | 6,731,520 | 99.91 | 11.56 | 3.12 |
| 15_39 | 7,210,024 | 7,204,486 | 99.92 | 13.54 | 2.82 |
| 15_4  | 4,443,218 | 4,438,825 | 99.90 | 9.33  | 2.27 |
| 15_40 | 7,086,622 | 7,079,355 | 99.90 | 12.40 | 3.05 |
| 15_42 | 7,161,880 | 7,156,762 | 99.93 | 13.20 | 2.95 |
| 15_44 | 8,127,210 | 8,120,585 | 99.92 | 14.63 | 3.07 |
| 15_45 | 6,375,488 | 6,359,340 | 99.75 | 11.65 | 2.77 |
| 15_6  | 5,625,168 | 5,613,329 | 99.79 | 10.65 | 2.65 |
| 15_7  | 6,707,210 | 6,700,377 | 99.90 | 11.53 | 3.05 |
| 15_8  | 6,446,688 | 6,439,460 | 99.89 | 11.43 | 2.95 |
| 15_9  | 5,796,292 | 5,784,271 | 99.79 | 11.03 | 2.68 |
| 17_10 | 9,010,778 | 9,002,137 | 99.90 | 15.38 | 3.32 |
| 17_11 | 8,943,758 | 8,936,256 | 99.92 | 15.98 | 3.13 |
| 17_12 | 7,184,346 | 7,177,937 | 99.91 | 13.60 | 2.80 |

|       |           |           |       |       |      |
|-------|-----------|-----------|-------|-------|------|
| 17_13 | 6,571,292 | 6,565,662 | 99.91 | 12.40 | 2.87 |
| 17_15 | 6,523,496 | 6,517,041 | 99.90 | 12.16 | 2.79 |
| 17_16 | 7,483,044 | 7,476,626 | 99.91 | 13.06 | 3.05 |
| 17_18 | 6,989,380 | 6,981,635 | 99.89 | 12.65 | 2.93 |
| 17_19 | 8,205,788 | 8,197,655 | 99.90 | 14.09 | 3.09 |
| 17_21 | 8,488,588 | 8,480,885 | 99.91 | 14.47 | 3.18 |
| 17_22 | 8,630,796 | 8,622,578 | 99.90 | 14.46 | 3.23 |
| 17_23 | 9,120,558 | 9,110,825 | 99.89 | 15.38 | 3.26 |
| 17_25 | 6,227,352 | 6,222,736 | 99.93 | 11.92 | 2.71 |
| 17_26 | 8,195,188 | 8,187,896 | 99.91 | 15.13 | 3.07 |
| 17_27 | 8,665,262 | 8,655,082 | 99.88 | 15.43 | 3.22 |
| 17_28 | 6,220,018 | 6,214,851 | 99.92 | 12.73 | 2.68 |
| 17_29 | 8,142,514 | 8,135,332 | 99.91 | 15.02 | 3.09 |
| 17_30 | 8,676,072 | 8,666,978 | 99.90 | 16.23 | 3.12 |
| 17_35 | 8,191,430 | 8,184,061 | 99.91 | 14.42 | 3.16 |
| 17_36 | 6,323,750 | 6,316,290 | 99.88 | 11.90 | 2.82 |
| 17_37 | 6,595,984 | 6,586,718 | 99.86 | 13.49 | 2.81 |
| 17_38 | 6,721,262 | 6,714,085 | 99.89 | 12.85 | 2.96 |
| 17_39 | 5,401,296 | 5,393,391 | 99.85 | 11.15 | 2.56 |

|       |           |           |       |       |      |
|-------|-----------|-----------|-------|-------|------|
| 17_4  | 7,241,486 | 7,235,594 | 99.92 | 12.66 | 3.05 |
| 17_40 | 7,019,608 | 7,011,391 | 99.88 | 12.63 | 3.06 |
| 17_47 | 8,454,242 | 8,443,745 | 99.88 | 13.33 | 3.54 |
| 17_5  | 8,312,630 | 8,297,745 | 99.82 | 13.64 | 3.19 |
| 17_50 | 7,089,876 | 7,081,733 | 99.89 | 12.72 | 3.12 |
| 17_7  | 8,744,272 | 8,736,458 | 99.91 | 15.39 | 3.20 |
| 17_8  | 8,727,598 | 8,712,662 | 99.83 | 14.85 | 3.21 |
| 17_9  | 8,883,866 | 8,873,767 | 99.89 | 15.52 | 3.26 |
| 8_13  | 7,869,786 | 7,836,845 | 99.58 | 13.66 | 3.23 |
| 8_14  | 9,542,734 | 9,512,462 | 99.68 | 13.31 | 3.79 |
| 8_21  | 8,190,180 | 8,161,519 | 99.65 | 12.81 | 3.50 |
| 8_24  | 6,946,436 | 6,915,273 | 99.55 | 11.54 | 3.21 |
| 8_3   | 7,806,654 | 7,759,844 | 99.40 | 13.71 | 3.07 |
| 8_30  | 8,023,172 | 7,993,892 | 99.64 | 11.91 | 3.78 |
| 8_31  | 8,687,750 | 8,664,571 | 99.73 | 12.57 | 3.72 |
| 8_34  | 8,449,446 | 8,422,722 | 99.68 | 12.42 | 3.79 |
| 8_35  | 8,410,684 | 8,348,512 | 99.26 | 12.71 | 3.66 |
| 8_36  | 8,937,690 | 8,908,286 | 99.67 | 14.22 | 3.53 |
| 8_4   | 9,219,142 | 9,184,467 | 99.62 | 12.55 | 4.02 |

|      |           |           |       |       |      |
|------|-----------|-----------|-------|-------|------|
| 8_46 | 7,182,940 | 7,156,460 | 99.63 | 12.00 | 3.11 |
| 8_6  | 8,113,694 | 8,094,255 | 99.76 | 11.44 | 3.82 |
| 9_10 | 7,640,254 | 7,624,237 | 99.79 | 11.69 | 3.41 |
| 9_11 | 7,232,864 | 7,216,376 | 99.77 | 11.73 | 3.22 |
| 9_13 | 8,034,964 | 8,013,008 | 99.73 | 12.76 | 3.41 |
| 9_14 | 7,844,526 | 7,828,231 | 99.79 | 12.26 | 3.43 |
| 9_15 | 6,432,856 | 6,422,383 | 99.84 | 10.70 | 3.09 |
| 9_16 | 7,063,950 | 7,051,801 | 99.83 | 11.74 | 3.30 |
| 9_17 | 8,126,102 | 8,110,123 | 99.80 | 12.43 | 3.66 |
| 9_18 | 6,367,190 | 6,356,529 | 99.83 | 10.60 | 3.13 |
| 9_19 | 7,626,328 | 7,608,817 | 99.77 | 12.37 | 3.44 |
| 9_20 | 7,742,678 | 7,725,928 | 99.78 | 12.44 | 3.49 |
| 9_21 | 6,610,242 | 6,597,548 | 99.81 | 11.45 | 3.17 |
| 9_25 | 7,028,532 | 7,015,242 | 99.81 | 11.64 | 3.34 |
| 9_26 | 6,081,240 | 6,058,884 | 99.63 | 10.64 | 3.03 |
| 9_27 | 6,146,164 | 6,135,446 | 99.83 | 11.05 | 2.94 |
| 9_28 | 7,041,768 | 7,030,156 | 99.84 | 12.76 | 3.14 |
| 9_29 | 6,305,796 | 6,295,767 | 99.84 | 11.36 | 3.04 |
| 9_30 | 3,521,636 | 3,517,517 | 99.88 | 7.47  | 2.19 |

|      |            |            |       |       |      |
|------|------------|------------|-------|-------|------|
| 9_31 | 13,842,342 | 13,817,232 | 99.82 | 16.78 | 4.69 |
| 9_32 | 7,972,194  | 7,957,438  | 99.81 | 12.36 | 3.57 |
| 9_33 | 3,802,610  | 3,797,947  | 99.88 | 6.66  | 2.46 |
| 9_34 | 6,321,938  | 6,292,160  | 99.53 | 11.25 | 2.91 |
| 9_35 | 5,657,146  | 5,630,905  | 99.54 | 10.14 | 2.79 |
| 9_36 | 6,057,914  | 6,028,760  | 99.52 | 11.97 | 2.74 |
| 9_37 | 5,918,868  | 5,874,504  | 99.25 | 10.80 | 2.73 |
| 9_38 | 6,425,746  | 6,395,167  | 99.52 | 11.96 | 2.92 |
| 9_4  | 6,723,080  | 6,708,292  | 99.78 | 11.37 | 3.23 |
| 9_40 | 5,712,060  | 5,687,481  | 99.57 | 10.85 | 2.69 |
| 9_41 | 7,140,682  | 7,105,960  | 99.51 | 12.84 | 3.08 |
| 9_42 | 6,406,356  | 6,373,953  | 99.49 | 11.61 | 2.88 |
| 9_43 | 6,590,952  | 6,560,726  | 99.54 | 12.24 | 2.97 |
| 9_5  | 7,418,000  | 7,404,778  | 99.82 | 11.83 | 3.31 |
| 9_7  | 8,023,468  | 8,007,665  | 99.80 | 12.18 | 3.53 |
| 9_8  | 7,849,436  | 7,831,074  | 99.77 | 12.12 | 3.46 |

---

**Supplementary Table 4:**Summary of the annotations of 26 genes.

| <i>G.hirsutum</i> gene<br>ID | Arabidopsis<br>ID | ArabDesc                                                                 | Swissprot ID | Trembl ID | KEGG ID          |
|------------------------------|-------------------|--------------------------------------------------------------------------|--------------|-----------|------------------|
| Gh_D03G1316                  | AT5G60800         | Heavy metal transport/detoxification<br>superfamily protein              |              | B9HQM6    |                  |
| Gh_D03G1317                  | AT4G05160         | AMP-dependent synthetase and ligase<br>family protein                    | Q9M0X9       | B9SCH9    | ath:AT4G05160    |
| Gh_D03G1318                  | AT4G05160         | AMP-dependent synthetase and ligase<br>family protein                    | Q9M0X9       | B9SCH9    | ath:AT4G05160    |
| Gh_D03G1319                  | AT3G14830         | unknow                                                                   |              | I1M2X5    |                  |
| Gh_D03G1320                  | AT1G08110         | lactoylglutathione lyase family protein /<br>glyoxalase I family protein | O04885       | A0A061    | pop:POPTR_749645 |
| Gh_D03G1321                  | AT1G08110         | lactoylglutathione lyase family protein /<br>glyoxalase I family protein | O04885       | B9SCI1    | pop:POPTR_749645 |
| Gh_D03G1322                  | AT1G08110         | lactoylglutathione lyase family protein /<br>glyoxalase I family protein | O04885       | B9SCI1    | pop:POPTR_749645 |
| Gh_D03G1323                  | AT1G08110         | lactoylglutathione lyase family protein /                                | O49818       | I1LR74    | pop:POPTR_749645 |

|             |           |                                                                             |         |        |                         |
|-------------|-----------|-----------------------------------------------------------------------------|---------|--------|-------------------------|
|             |           | glyoxalase I family protein                                                 |         |        |                         |
| Gh_D03G1324 | AT3G45010 | serine carboxypeptidase-like 48                                             | Q56WF8  | Q2Z1Y2 | pop:POPTR_1117480       |
| Gh_D03G1325 | AT5G22950 | SNF7 family protein                                                         | Q9FFB3  | F6GW93 | vvi:100260253           |
| Gh_D03G1326 | AT2G31490 | unknow                                                                      |         | M5Y579 |                         |
| Gh_D03G1327 | AT3G44990 | xyloglucan endo-transglycosylase-related 8                                  | Q9S JL9 | C6TJL7 | ath:AT2G36870           |
| Gh_D03G1328 | AT2G28130 | unknow                                                                      |         | D7SNB6 |                         |
| Gh_D03G1329 | AT3G44940 | Protein of unknown function (DUF1635)                                       |         | I1LR87 |                         |
| Gh_D03G1330 | AT1G08130 | DNA ligase 1                                                                | Q42572  | M5W3M2 | ath:AT1G08130           |
| Gh_D03G1331 | AT2G28150 | Domain of unknown function (DUF966)                                         |         | B9SCJ8 |                         |
| Gh_D03G1332 | AT5G22920 | CHY-type/CTCHY-type/RING-type Zinc<br>finger protein                        | Q9CR50  | B9HQP1 | ath:AT5G22920           |
| Gh_D03G1333 | AT2G16030 | S-adenosyl-L-methionine-dependent<br>methyltransferases superfamily protein |         | B9RVC0 |                         |
| Gh_D03G1334 | AT2G30020 | Protein phosphatase 2C family protein                                       | O80871  | B9S5C5 | spu:576623              |
| Gh_D03G1335 | AT1G07150 | mitogen-activated protein kinase kinase<br>kinase 13                        | Q40541  | M5WRK0 | nve:NEMVE_v1g1043<br>85 |
| Gh_D03G1336 | AT2G30500 | Kinase interacting (KIP1-like) family<br>protein                            |         | B9SD87 | mdo:100011544           |
| Gh_D03G1337 | AT1G07120 | unknow                                                                      | Q9LI74  | B9HND5 |                         |

|             |           |                                  |        |        |                  |
|-------------|-----------|----------------------------------|--------|--------|------------------|
| Gh_D03G1338 | AT1G07110 | fructose-2,6-bisphosphatase      | Q9MB58 | D7SJU7 | vvi:100244966    |
| Gh_D03G1339 | AT3G16720 | TOXICOS EN LEVADURA 2            | Q8L9T5 | D7SJU6 | mdo:100028589    |
| Gh_D03G1340 | AT1G22500 | RING/U-box superfamily protein   | Q9SRM0 | B9SQP8 | dan:Dana_GF16575 |
| Gh_D03G1341 | AT2G30080 | ZIP metal ion transporter family | O64738 | B9HND0 |                  |

---

## Supplementary Figures



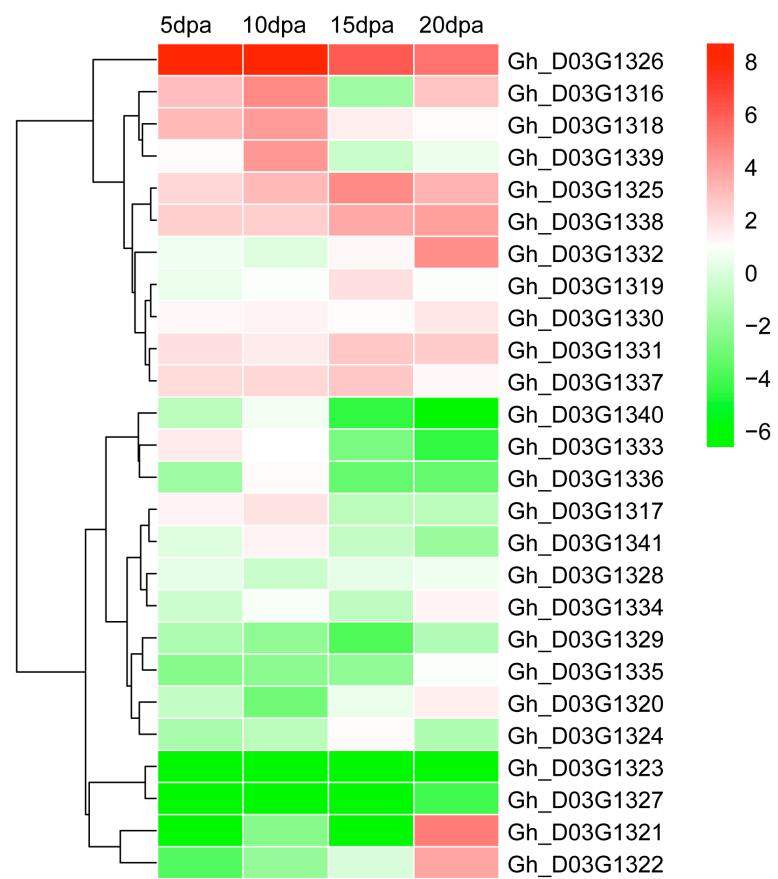

**Supplementary Figure 1:** Expression pattern of 26 genes related to fiber length during the fiber development stage. Red indicates high expression, and green indicates low expression.

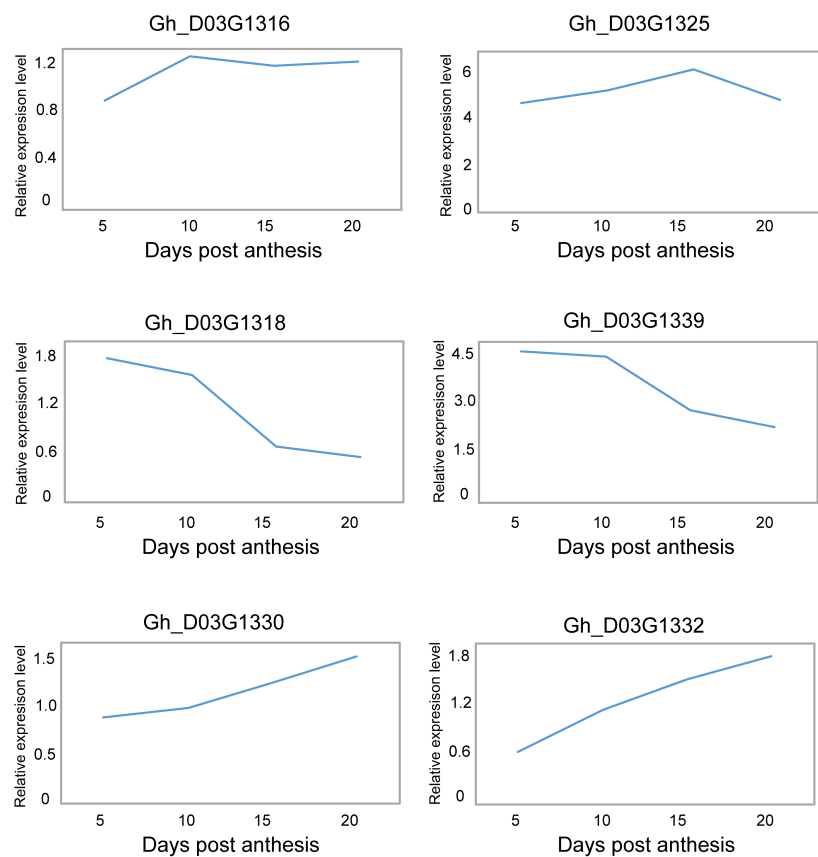

**Supplementary Figure 2:** Expression of genes during the fiber development stage determined by qRT-PCR.

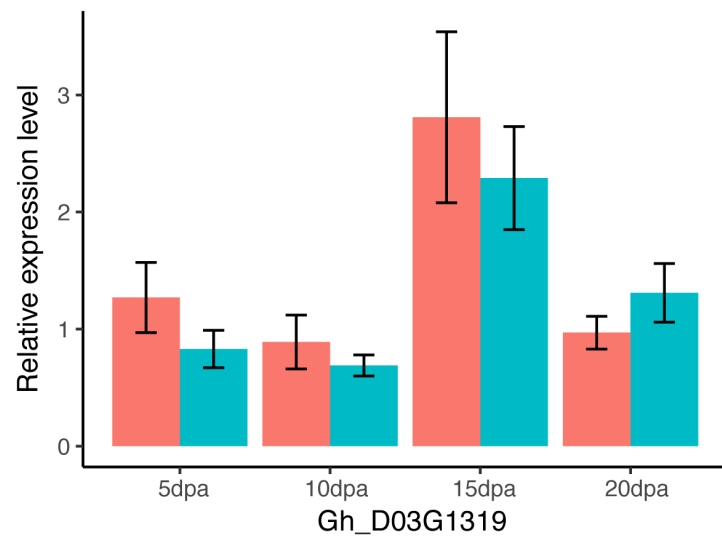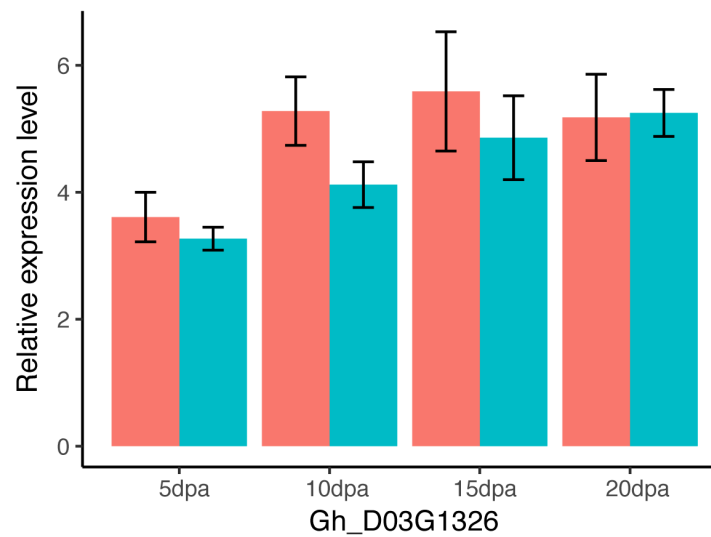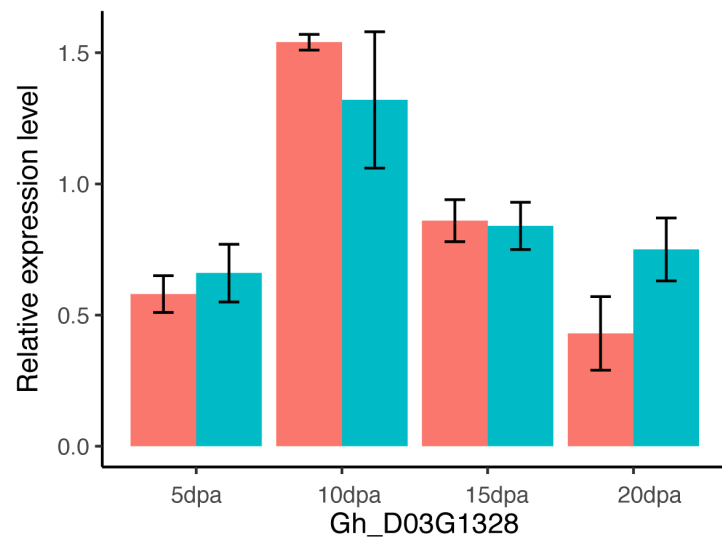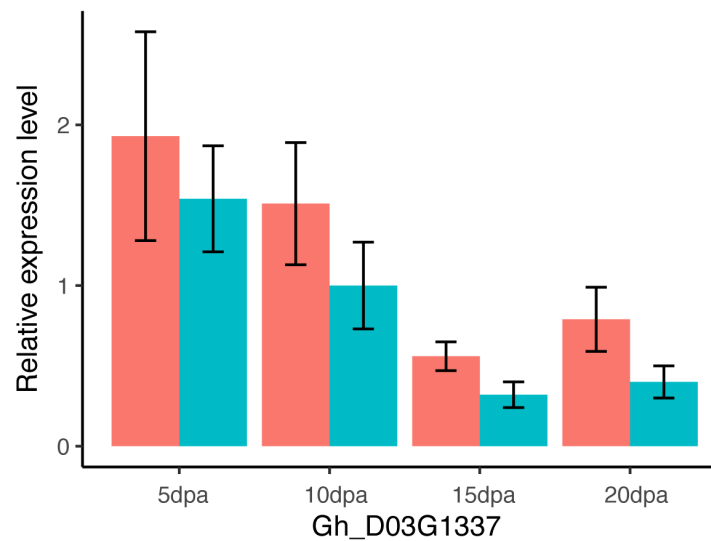

**Supplementary Figure 3.** Expression profiles of *Gh\_D03G1319*, *Gh\_D03G1326*, *Gh\_D03G1328* and *Gh\_D03G1337* between long fiber variety ‘CG3020-3’ (red) and short fiber variety ‘Ken27-3’ (green). The x-axis represents developmental stages (5, 10, 15, and 20 dpa), and the y-axis indicates the relative expression levels as determined by qRT-PCR. The error bars indicate the standard deviation of three biological replicates.
